# Supplementary material
Source: PubMed Central journal article supplement (PMC3708965)
Supplement: NIHMS489717-supplement-01.pdf [file NIHMS489717-supplement-01.pdf]

Supplemental Figure 1:

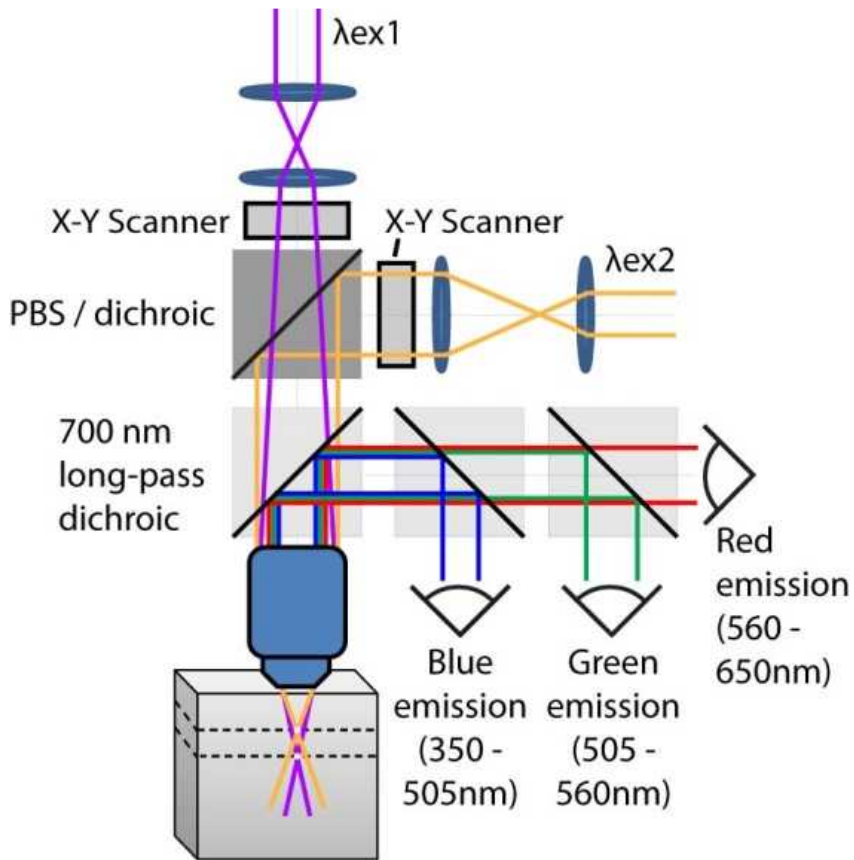

## Supplemental figure 2:

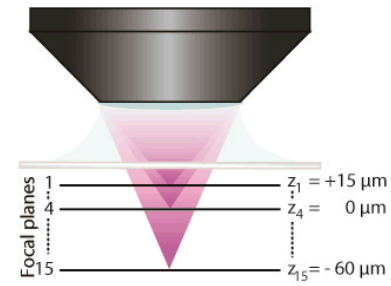

Full width at half maxima of the intensity profiles shown:

| Focal plane           | 1   | 2   | 3   | 4   | 5   | 6   | 7    |
|-----------------------|-----|-----|-----|-----|-----|-----|------|
| FWHM( $\mu\text{m}$ ) | 8.8 | 6.6 | 6.2 | 5.0 | 7.6 | 7.1 | 7.9  |
|                       | 8   | 9   | 10  | 11  | 12  | 13  | 14   |
|                       | 8.5 | 8.7 | 7.5 | 9.2 | 9.0 | 9.8 | 10.5 |

Axial intensity profiles of 1 micron beads at varying lens telescope separations

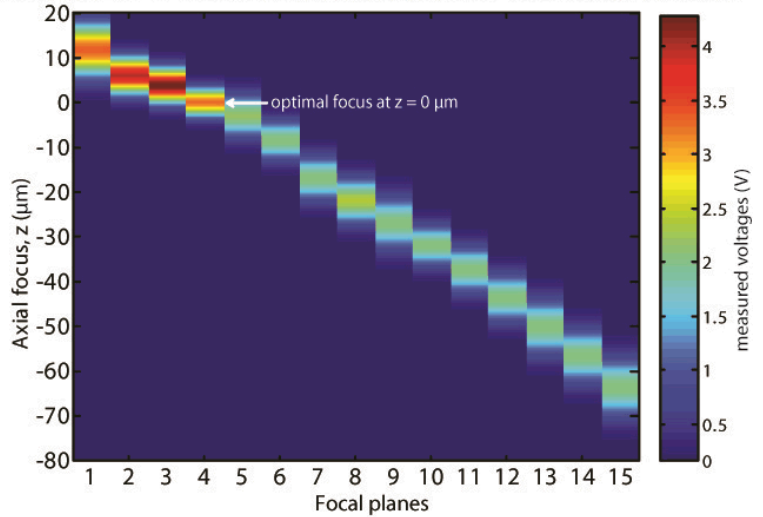

Shallow (planes 1-3) and deep (planes 5-15) focal planes correspond to converging and diverging light entering the objective, respectively. The first lens in the lens telescope located before beam combination (see Figure 1) was translated  $\sim 25\text{mm}$  to create focal planes 1-15. The focal lengths of both lenses in the telescope were  $30\text{mm}$ .
